# Supplementary material for: Estimated Glucose Disposal Rate Predicts Cardiovascular Disease Risk Among Adults with Short Sleep Duration: A National Prospective Cohort Study
Source: Research Square preprint supplement (doi:10.21203/rs.3.rs-6725425/v1), 2025-06-03

**Supplemental Figures**

**Supplemental Figure1** The flowchart of study participants.

**Supplementary Figure 2** Kaplan-Meier curves for the cumulative incidence of cardiovascular disease.

**Supplementary Figure 3** Kaplan-Meier curves for the cumulative incidence of heart disease.

**Supplementary Figure 4** Kaplan-Meier curves for the cumulative incidence of stroke.

**Supplementary Figure 5** Mediation effect of obesity between the eGDR and cardiovascular diseases.

**Supplementary Figure 6** Mediation effect of obesity between estimated glucose disposal rate and heart disease.

**Supplementary Figure 7** Mediation effect of obesity between estimated glucose disposal rate and stroke.

**Supplementary Figure 8** Subgroup analysis of HRs(95% CIs) for CVD、Heart disease and stroke of estimated glucose disposal rate

**Supplementary** **Figure 1** The flowchart of study participants.


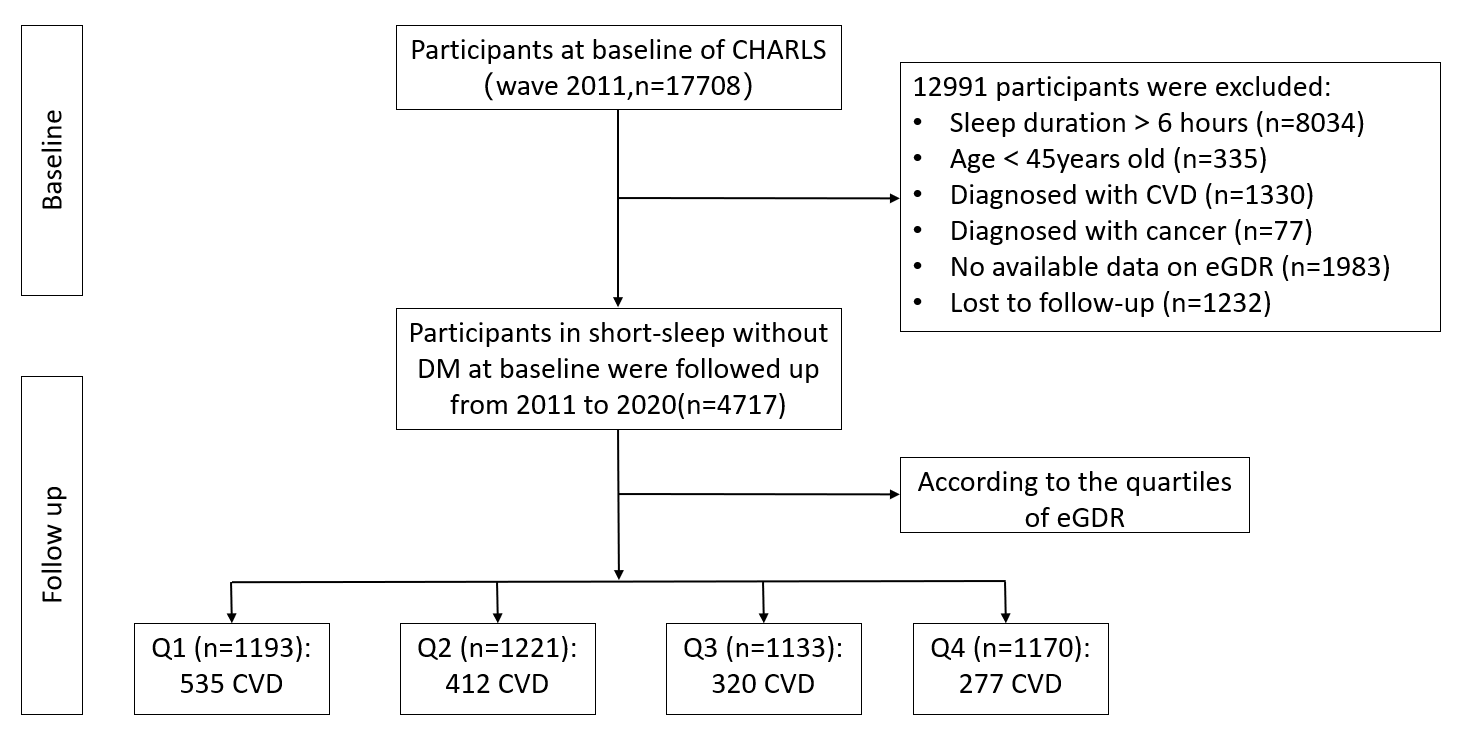


**Supplementary Figure 2** Kaplan-Meier curves for the cumulative incidence of cardiovascular disease.

**
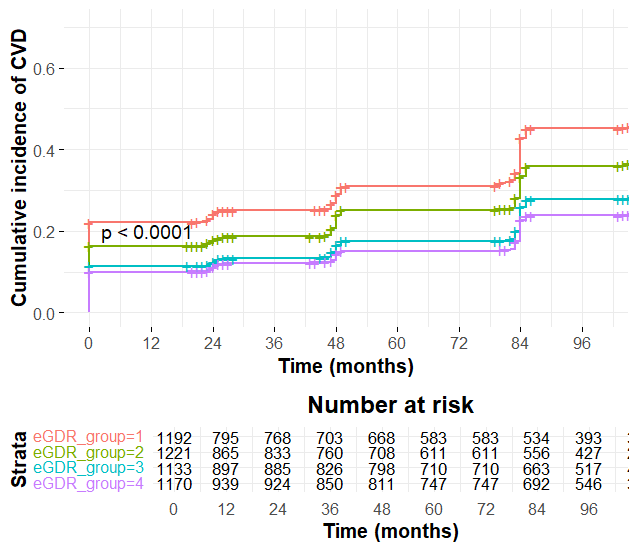
**

**Supplementary Figure 3** Kaplan-Meier curves for the cumulative incidence of heart disease.


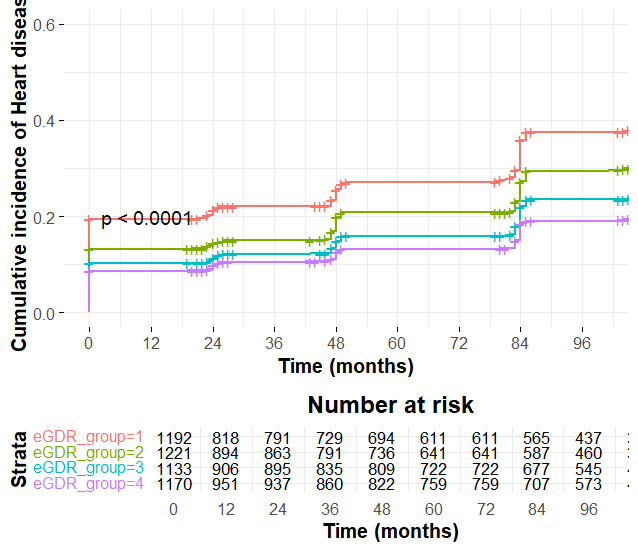


**Supplementary Figure 4** Kaplan-Meier curves for the cumulative incidence of stroke.

**
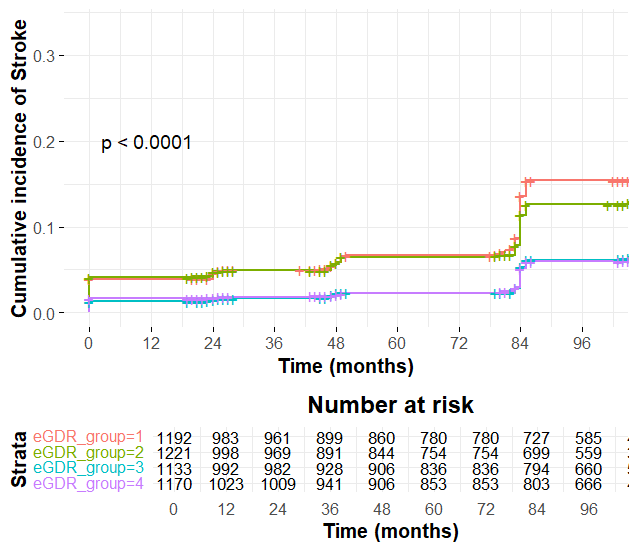
**

**Supplementary Figure 5** Mediation effect of obesity between the eGDR and cardiovascular diseases.


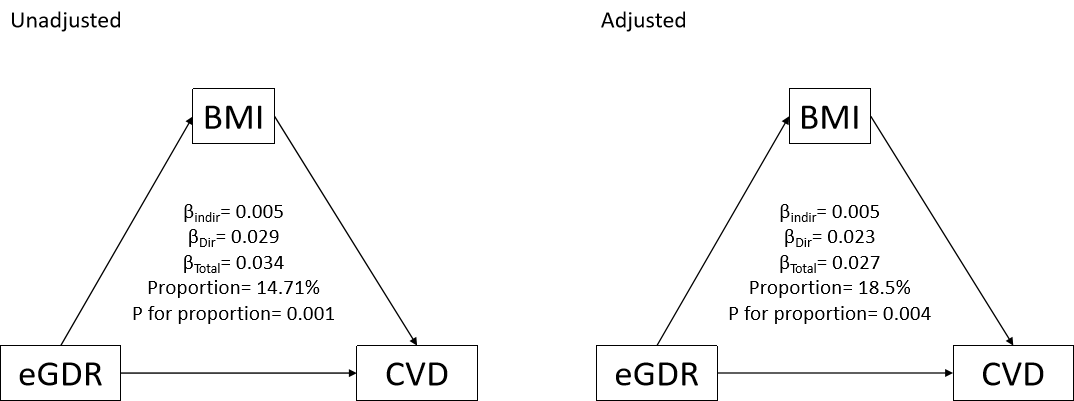


**Supplementary Figure 6** Mediation effect of obesity between estimated glucose disposal rate and heart disease.


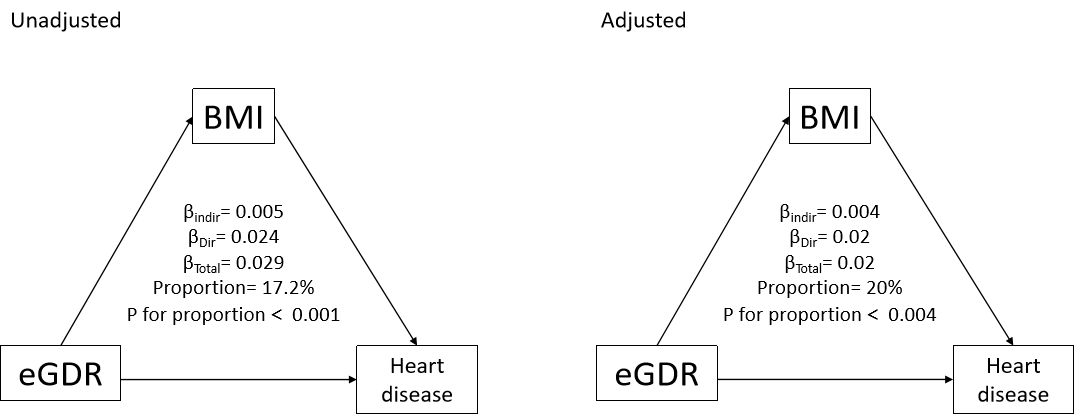


**Supplementary Figure 7** Mediation effect of obesity between estimated glucose disposal rate and stroke.


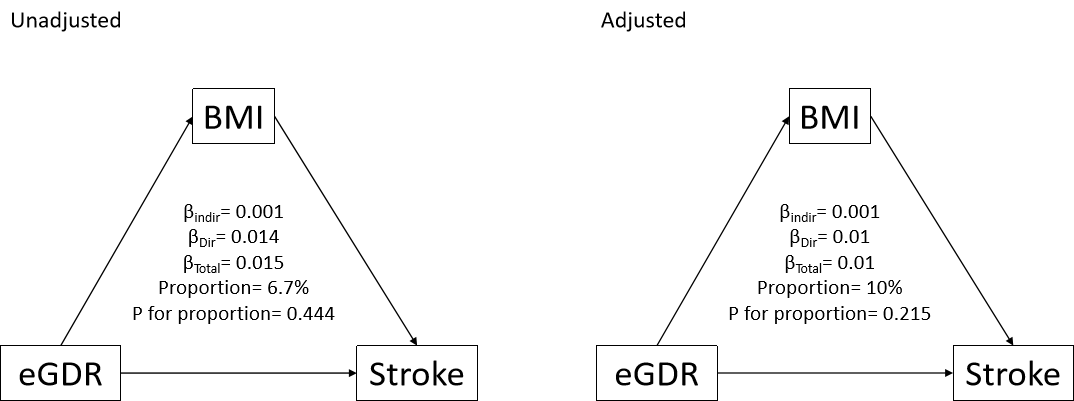


**Supplementary Figure 8** Subgroup analysis of HRs(95% CIs) for CVD、Heart disease and stroke of estimated glucose disposal rate


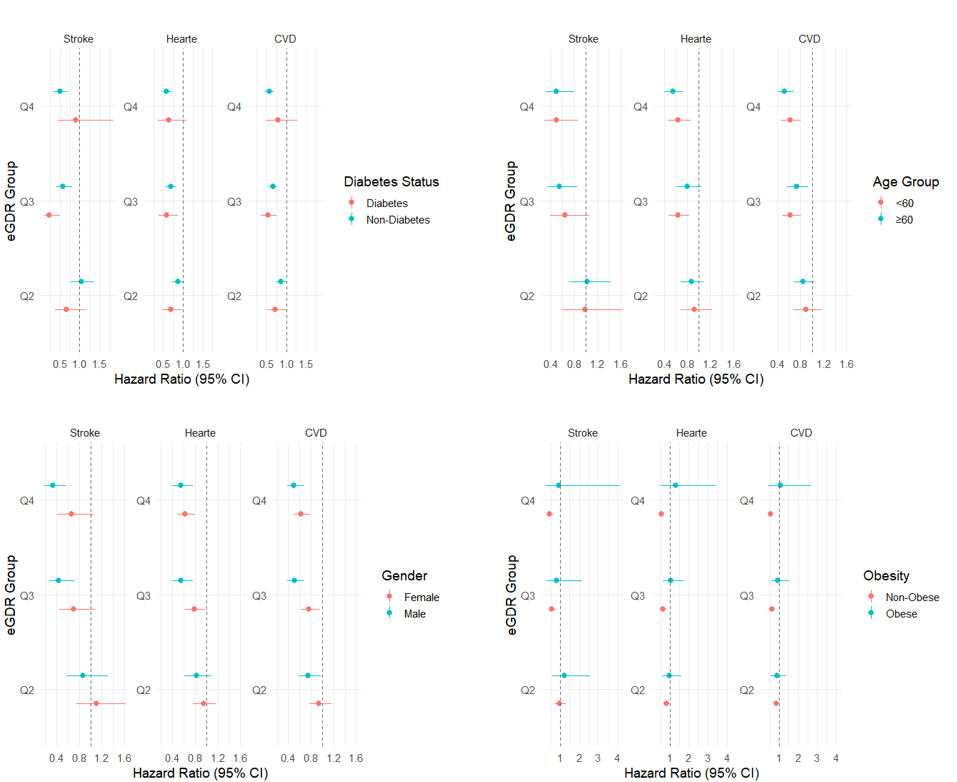

Supplement: Supplementary file 1 [file 4455a90d3011bbbb70ab4927.docx]
