# Supplementary material for: Estimated Glucose Disposal Rate Predicts Cardiovascular Disease Risk Among Adults with Short Sleep Duration: A National Prospective Cohort Study
Source: Research Square preprint supplement (doi:10.21203/rs.3.rs-6725425/v1), 2025-06-03
Supplement: Supplementary file 2 [file d9f24316d8e8ba13144145d9.docx]

**Supplemental Tables**

**Table S1.**Baseline characteristics of participants by outcomes

**Table S2.** Association of estimated glucose disposal rate with cardiovascular diseases among participants without diabetes

**Table S3.** Association of estimated glucose disposal rate with cardiovascular diseases among adults with short sleep duration (≤5 hours)

**Table S1.**Baseline characteristics of participants by outcomes

| Characteristics | Overall | Without CVD | CVD | *P* value |
| --- | --- | --- | --- | --- |
| n | 4717 | 3173 | 1544 |  |
| eGDR | 9.03±2.32 | 9.31±2.25 | 8.47±2.36 | ＜0.001 |
| Age,years | 60.34±9.25 | 59.8±9.51 | 61.45±8.59 | ＜0.001 |
| Male,n(%) | 2117（44.88） | 1520(47.92) | 597(38.67) | ＜0.001 |
| SBP,mmHg | 129.82±21.7 | 128.27±21.29 | 132.99±22.21 | ＜0.001 |
| DBP,mmHg | 75.15±12.26 | 74.6±12.28 | 76.27±12.15 | ＜0.001 |
| BMI,KG/M2 | 24.18±37.88 | 23.02±3.83 | 24.02±4.13 | ＜0.001 |
| WC,cm | 83.88±12.91 | 82.91±12.38 | 85.88±13.73 | ＜0.001 |
| Rural residence,n(%) | 3080(65.3) | 2136(67.34) | 944(61.14) | 0.862 |
| Marred,n(%) | 4061(86.09) | 2753(86.79) | 1307(84.65) | 0.051 |
| Alcohol consumption,n(%) | 1485(31.48) | 1093(34.46) | 392(25.39) | ＜0.001 |
| Smoking,n(%) | 1417(30.05) | 1030(32.48) | 387(25.06) | ＜0.001 |
| Hemoglobin,g/dL | 14.27±2.19 | 14.22±2.2 | 14.38±2.15 | 0.216 |
| FBG,mg/dL | 110.5±38.07 | 109.13±36.12 | 113.19±41.43 | 0.275 |
| HbA1c,% | 5.26±0.81 | 5.22±0.75 | 5.34±0.9 | 0.013 |
| TC,mg/dL | 194.4±39.62 | 193.04±39.19 | 197.19±40.34 | 0.011 |
| TG,mg/dL | 132.4±103.4 | 129.34±105.32 | 138.58±99.07 | ＜0.001 |
| HDL,mg/dL | 51.67±15.48 | 52.25±15.41 | 50.48±15.56 | 0.242 |
| LDL,mg/dL | 116.6±35.42 | 115.23±34.69 | 119.53±36.7 | ＜0.001 |
| BUN,mg/dL | 15.82±4.7 | 15.91±4.77 | 15.62±4.56 | 0.043 |
| UA,mg/dL | 4.46±1.26 | 4.47±1.27 | 4.43±1.25 | 0.591 |
| hsCRP,mg/dL | 2.8±7.82 | 2.74±8.06 | 2.92±7.33 | ＜0.001 |
| Serum creatinine,mg/dL | 0.79±0.28 | 0.79±0.31 | 0.78±0.21 | 0.453 |
| Kidney disease,n(%) | 190(5.54) | 169(5.36) | 139(9.06) | ＜0.001 |
| Obestiy,n(%) | 525（11.1） | 295(9.39) | 230(15.11) | ＜0.001 |
| Diabetes,n(%) | 699(14.8) | 419(13.2) | 280(18.1) | ＜0.001 |

***BMI***, body mass index; ***BUN,*** blood urea nitrogen; ***CVD,*** cardiovascular disease; ***DBP,*** diastolic blood pressure; ***DM,*** diabetes mellitus; ***eGDR,*** estimated glucose disposal rate; ***FBG,*** fasting blood glucose; ***HbA1c,*** glycosylated hemoglobin A1c; ***HDL,*** high density lipoprotein; ***hsCRP,*** high-sensitivity C-reactive protein; ***LDL,*** low density lipoprotein; ***SBP,*** systolic blood pressure; ***TC,*** total cholesterol; ***TG,*** triglycerides; ***UA,*** uric acid; ***WC,*** waist circumference

**Table S2**. Association of estimated glucose disposal rate with cardiovascular diseases among participants without diabetes

| Variables | Cardiovascular disease | | Heart disease | | Stroke | |
| --- | --- | --- | --- | --- | --- | --- |
|  | HR(95%CI) | *P* value | HR(95%CI) | *P* value | HR(95%CI) | *P* value |
| eGDR# | 0.9(0.88-0.93) | ＜0.001 | 0.91(0.88-0.94) | ＜0.001 | 0.87(0.83-0.92) | ＜0.001 |
| Q1 | Ref |  | Ref |  | Ref |  |
| Q2 | 0.87(0.74-1.02) | 0.076 | 0.89(0.74-1.06) | 0.182 | 1.03(0.78-1.37) | 0.815 |
| Q3 | 0.67(0.56-0.79) | ＜0.001 | 0.70(0.58-0.85) | ＜0.001 | 0.58(0.42-0.80) | 0.001 |
| Q4 | 0.58(0.48-0.69) | ＜0.001 | 0.60(0.49-0.73) | ＜0.001 | 0.50(0.35-0.71) | ＜0.001 |

Abbreviation: ***BUN***, blood urea nitrogen; ***CI***, confidence interval; ***eGDR,*** estimated glucose disposal rate; ***HDL***, high density lipoprotein; ***HR***, hazard ratio; ***hsCRP***, high-sensitivity C-reactive protein; ***LDL***, low density lipoprotein;;***Ref,*** reference; ***TC***, total cholesterol; ***TG***, triglyceride; ***UA***, uric acid.

The model adjusted age, sex, rural residence, marital status, education, smoking, alcohol consumption status, region, TC, HDL, TG, LDL, BUN, UA, hsCRP, hemoglobin, chronic kidney disease, obesity,and diabetes.

# Per SD increase

**Table S3.** Association of estimated glucose disposal rate with cardiovascular diseases among adults with short sleep duration (≤5 hours)

| Variables | Cardiovascular disease | | Heart disease | | Stroke | |
| --- | --- | --- | --- | --- | --- | --- |
|  | HR(95%CI) | *P* value | HR(95%CI) | *P* value | HR(95%CI) | *P* value |
| eGDR# | 0.9(0.87-0.93) | ＜0.001 | 0.92(0.88-0.95) | ＜0.001 | 0.86(0.81-0.91) | ＜0.001 |
| Q1 | Ref |  | Ref |  | Ref |  |
| Q2 | 0.8(0.67-0.96) | 0.017 | 0.83(0.67-1.01) | 0.06 | 0.93(0.68-1.27) | 0.651 |
| Q3 | 0.66(0.54-0.8) | ＜0.001 | 0.72(0.58-0.89) | 0.002 | 0.53(0.37-0.76) | ＜0.001 |
| Q4 | 0.55(0.45-0.68) | ＜0.001 | 0.6(0.48-0.76) | ＜0.001 | 0.42(0.28-0.64) | ＜0.001 |

Abbreviation: ***BUN***, blood urea nitrogen; ***CI***, confidence interval; ***eGDR,*** estimated glucose disposal rate; ***HDL***, high density lipoprotein; ***HR***, hazard ratio; ***hsCRP***, high-sensitivity C-reactive protein; ***LDL***, low density lipoprotein;;***Ref,*** reference; ***TC***, total cholesterol; ***TG***, triglyceride; ***UA***, uric acid.

The model adjusted age, sex, rural residence, marital status, education, smoking, alcohol consumption status, region, TC, HDL, TG, LDL, BUN, UA, hsCRP, hemoglobin, chronic kidney disease, obesity,and diabetes.

# Per SD increase
